# Supplementary material for: Distilling a Visual Network of Retinitis Pigmentosa Gene-Protein Interactions to Uncover New Disease Candidates
Source: PubMed Central journal article supplement (PMC4534355; doi:10.1371/journal.pone.0135307), 2015-08-12

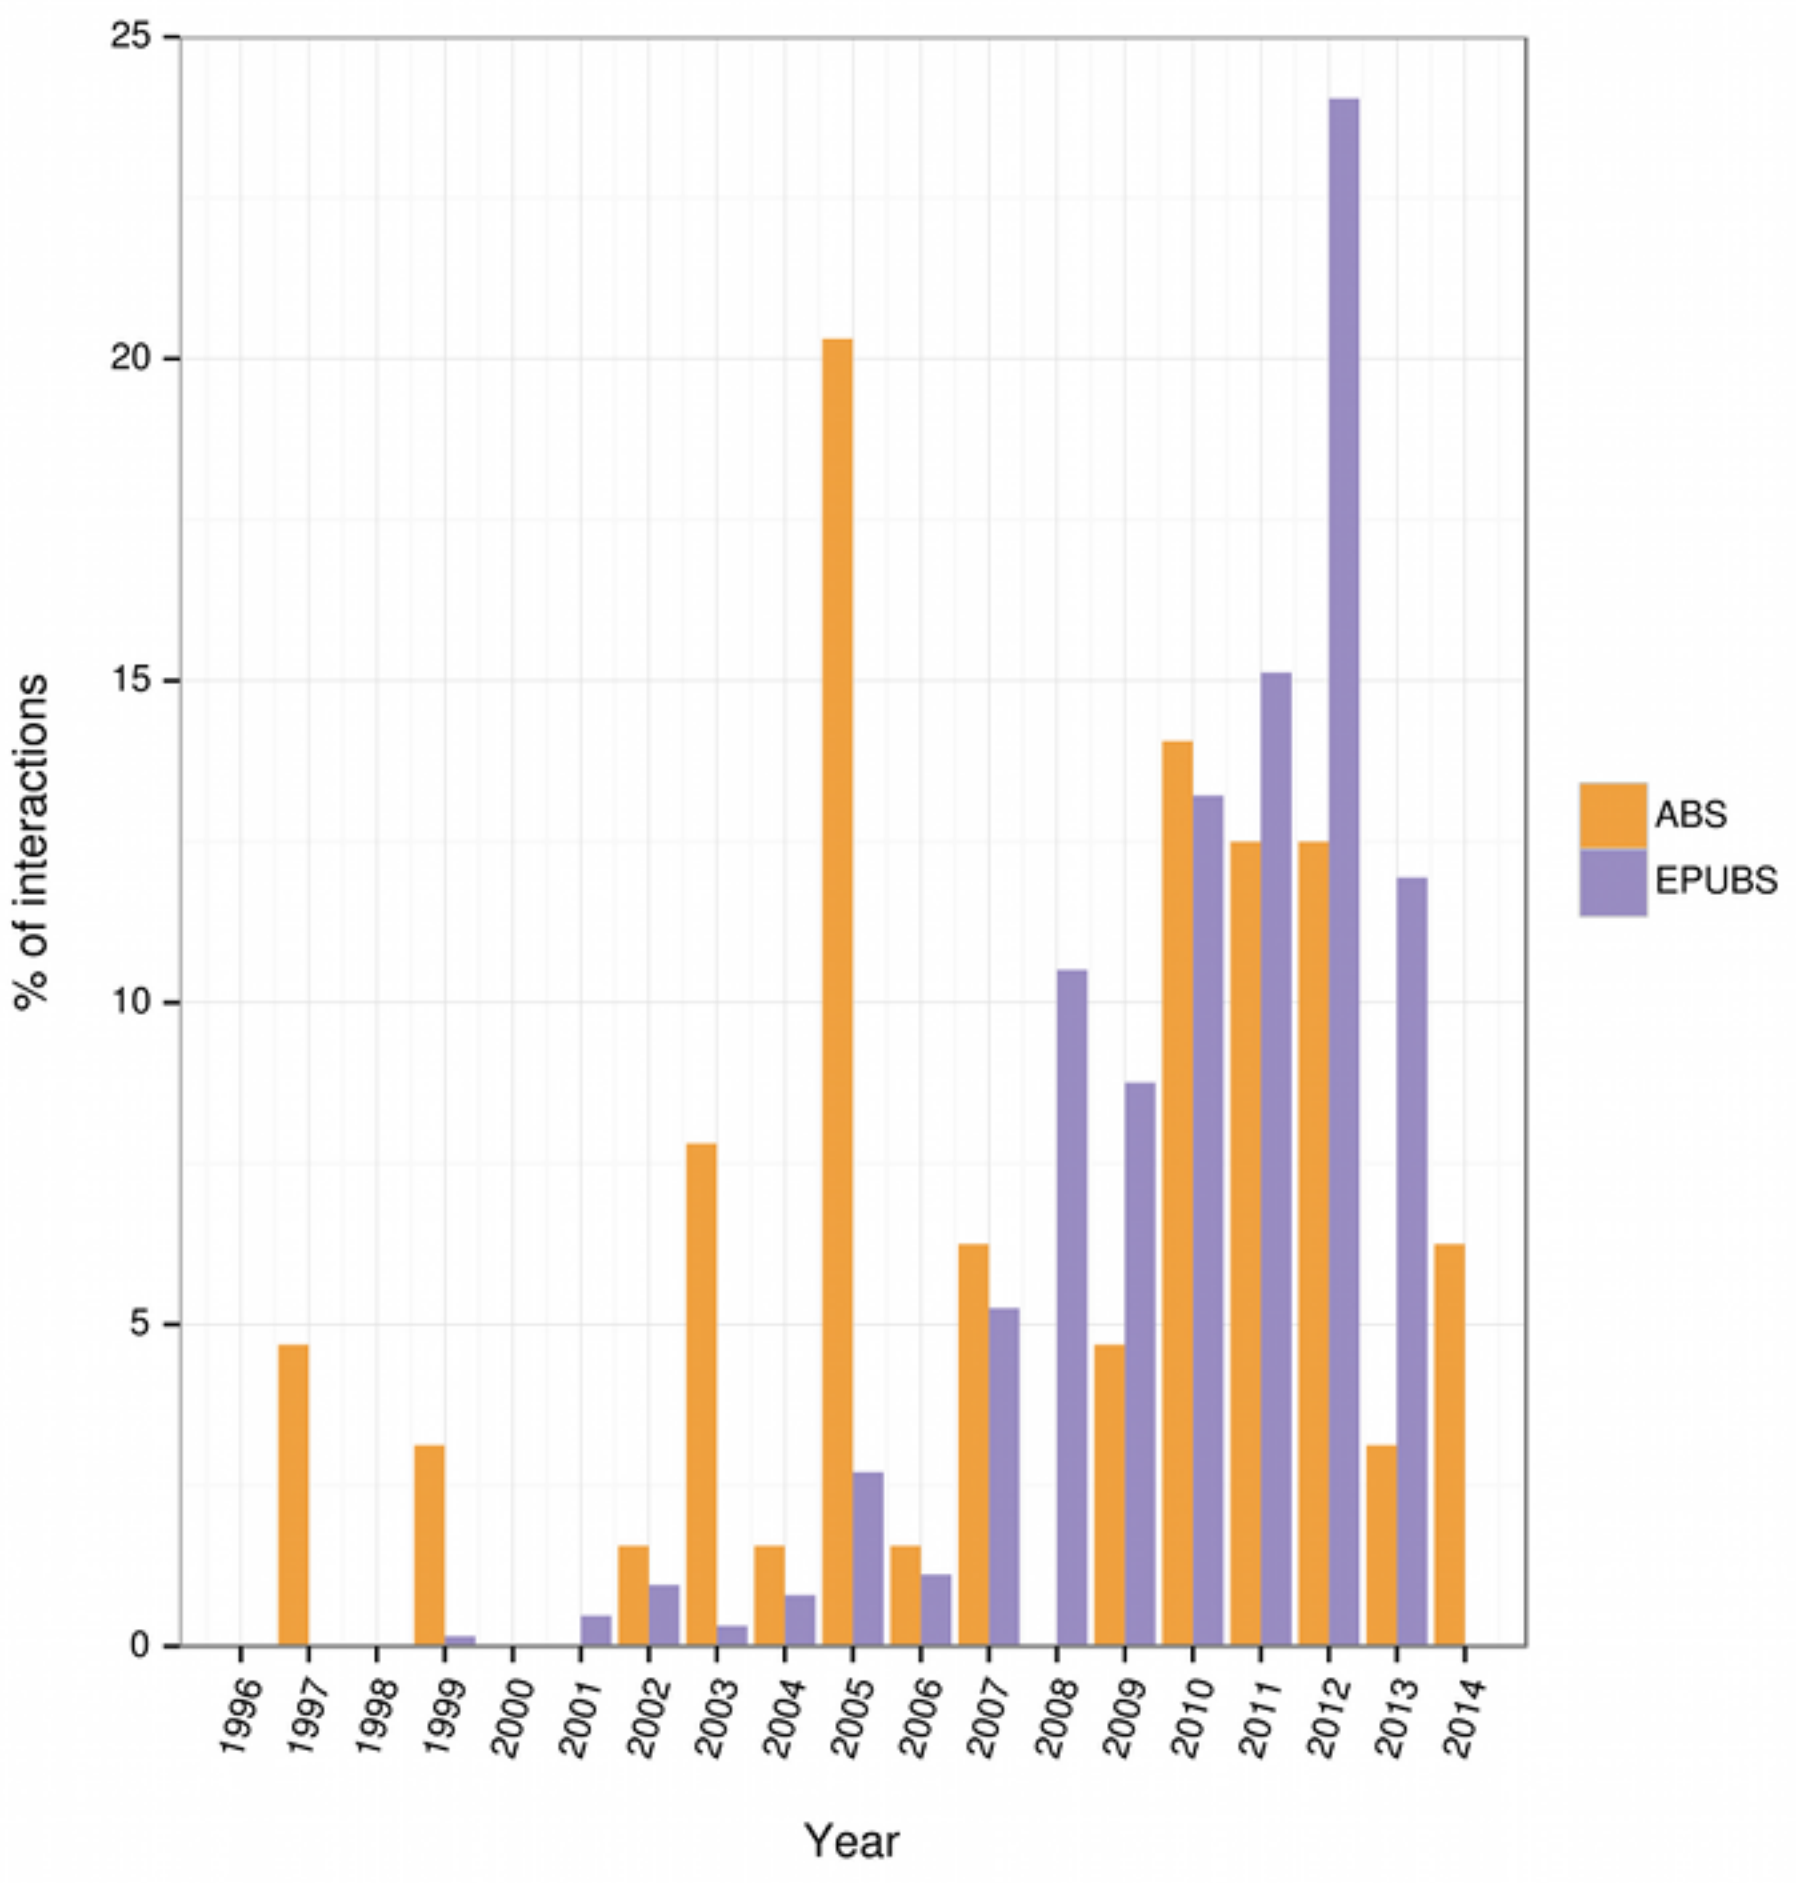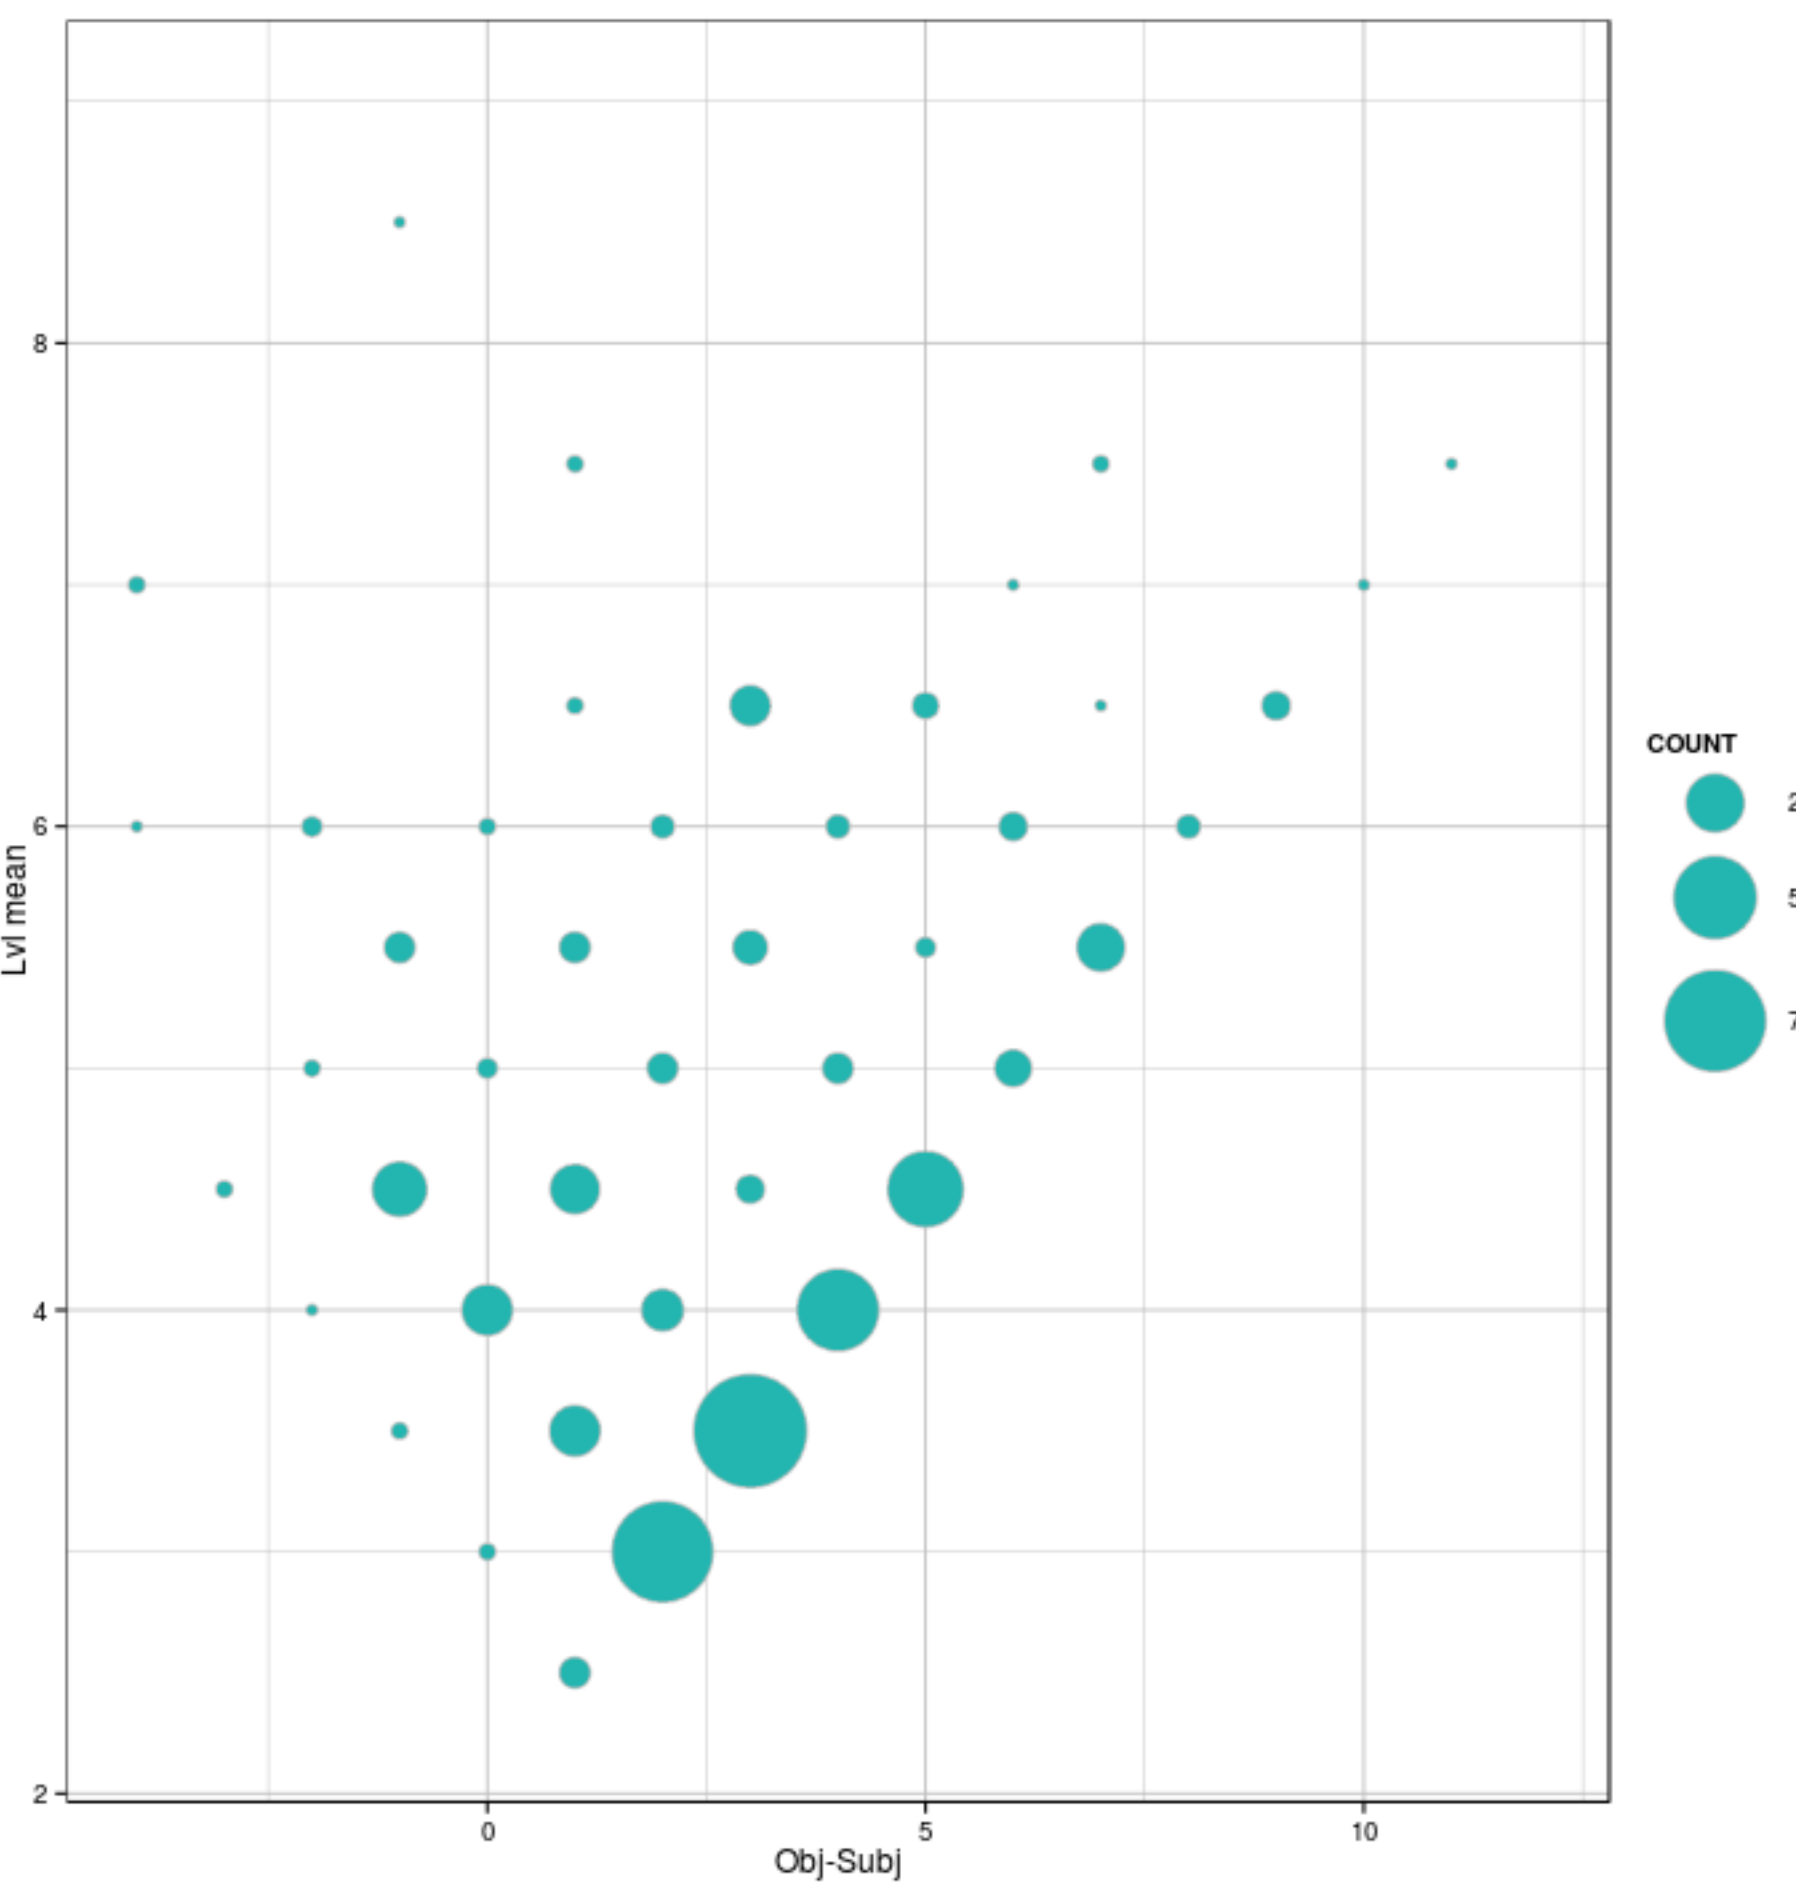

Supplement: pone.0135307.s001.pdf [file pone.0135307.s001.pdf]
