# Supplementary material for: Distilling a Visual Network of Retinitis Pigmentosa Gene-Protein Interactions to Uncover New Disease Candidates
Source: PubMed Central journal article supplement (PMC4534355; doi:10.1371/journal.pone.0135307), 2015-08-12
Supplement: pone.0135307.s004.pdf [file pone.0135307.s004.pdf]

**S1 Table. Summary of the 110 genes related to RP/LCA phenotype inheritance.** The genes were selected from RetNet [1] and classified into four Mendelian inheritance categories, of which the first contains six genes that depending on the mutation studied present a dominant or a recessive phenotype. Reference HGNC[2,3] symbol notation was used as gene identifier across all the analyses. Gene symbols in red correspond to 35 selected syndromic RP/LCA genes, the rest of symbols are in black and comprise 75 non-syndromic RP/LCA genes. Location column shows the starting coordinate on a chromosome and the gene strand for the longest transcript isoform of the gene annotated over the h19 human genome version. Those genomic locations are linked (one can click on them) to the UCSC genome browser [4]. The other columns show the identifiers linked to the corresponding entry on the OMIM [5], NCBI-Gene [6], NCBI-RefSeq [7], and UniProt [8] databases.

1. RetNet, the Retinal Information Network. <http://sph.uth.edu/retnet/>
2. HUGO Gene Nomenclature Committee. <http://www.genenames.org/>
3. Gray KA, Yates B, Seal RL, Wright MW, Bruford EA. Genenames.org: the HGNC resources in 2015. *Nucleic Acids Res.* 2015; 43(Database issue):D1079-85. doi:10.1093/nar/gku1071
4. Karolchik D, Barber GP, Casper J, Clawson H, Cline MS, Diekhans M, et al. The UCSC Genome Browser database: 2014 update. *Nucleic Acids Res.* 2014; 42:D764-70. doi:10.1093/nar/gkt1168
5. Xu J, Li Y. Discovering disease-genes by topological features in human protein-protein interaction network. *Bioinformatics.* 2006; 22:2800-2805. doi:10.1093/bioinformatics/btl467
6. Brown G, Hem V, Katz K, Ovetsky M, Wallin C, Ermolaeva O, et al. Gene: a gene-centered information resource at NCBI. *Nucleic Acids Res.* 2014; 43(Database issue):D36-42. doi:10.1093/nar/gku1055
7. Pruitt KD, Brown GR, Hiatt SM, Thibaud-Nissen F, Astashyn A, Ermolaeva O, et al. RefSeq: an update on mammalian reference sequences. *Nucleic Acids Res.* 2014; 42(Database issue):D756-63. doi:10.1093/nar/gkt1114
8. The UniProt Consortium. Activities at the Universal Protein Resource (UniProt). *Nucleic Acids Res.* 2014; (Database issue)42:D191-8. doi:10.1093/nar/gkt1140

| SYMBOL                              | HG19 LOCATION      | OMIM   | GENBANK | REFSEQ       | UNIPROT              |
|-------------------------------------|--------------------|--------|---------|--------------|----------------------|
| <b>AUTOSOMAL DOMINANT/RECESSIVE</b> |                    |        |         |              |                      |
| <b>BEST1</b>                        | chr11:61717356 (+) | 607854 | 7439    | NM_004183    | BEST1_HUMAN, O76090  |
| <b>NR2E3</b>                        | chr15:72102894 (+) | 604485 | 10002   | NM_014249    | NR2E3_HUMAN, Q9Y5X4  |
| <b>NRL</b>                          | chr14:24549316 (-) | 162080 | 4901    | NM_006177    | NRL_HUMAN, P54845    |
| <b>RHO</b>                          | chr3:129247482 (+) | 180380 | 6010    | NM_001664    | OPSD_HUMAN, P08100   |
| <b>RP1</b>                          | chr8:55528627 (+)  | 603937 | 6101    | NM_001618    | RP1_HUMAN, P56715    |
| <b>RPE65</b>                        | chr1:68894507 (-)  | 180069 | 6121    | NM_000329    | RPE65_HUMAN, Q16518  |
| <b>AUTOSOMAL DOMINANT</b>           |                    |        |         |              |                      |
| <b>CA4</b>                          | chr17:58227302 (+) | 114760 | 762     | NM_000350    | CAH4_HUMAN, P22748   |
| <b>CRX</b>                          | chr19:48325099 (+) | 602225 | 1406    | NM_000554    | CRX_HUMAN, O43186    |
| <b>FSCN2</b>                        | chr17:79495417 (+) | 607643 | 25794   | NM_012418    | FSCN2_HUMAN, O14926  |
| <b>GUCA1B</b>                       | chr6:42151022 (-)  | 602275 | 2979    | NM_002098    | GUC1B_HUMAN, Q9UMX6  |
| <b>HK1</b>                          | chr10:71029740 (+) | 142600 | 3098    | NM_033496    | HXK1_HUMAN, P19367   |
| <b>IMPDH1</b>                       | chr7:128032331 (-) | 146690 | 3614    | NM_001142573 | IMDH1_HUMAN, P20839  |
| <b>KLHL7</b>                        | chr7:23145353 (+)  | 611119 | 55975   | NM_001031710 | KLHL7_HUMAN, Q81XQ5  |
| <b>OR2W3</b>                        | chr1:248058889 (+) | —      | 343171  | NM_001001957 | OR2W3_HUMAN, Q7Z3T1  |
| <b>OTX2</b>                         | chr14:57267425 (-) | 600037 | 5015    | NM_021728    | OTX2_HUMAN, P32243   |
| <b>PRPF3</b>                        | chr1:150293928 (+) | 607301 | 9129    | NM_004698    | PRPF3_HUMAN, O43395  |
| <b>PRPF4</b>                        | chr9:116037914 (+) | 607795 | 9128    | NM_003913    | PRPF4_HUMAN, O43172  |
| <b>PRPF6</b>                        | chr20:62612431 (+) | 613979 | 24148   | NM_012469    | PRPF6_HUMAN, O94906  |
| <b>PRPF8</b>                        | chr17:1553923 (-)  | 607300 | 10594   | NM_006445    | PRPF8_HUMAN, Q6P2Q9  |
| <b>PRPF31</b>                       | chr19:54618790 (+) | 606419 | 26121   | NM_015629    | PRPF31_HUMAN, Q8WWY3 |
| <b>PRPH2</b>                        | chr6:42664333 (-)  | 179605 | 5961    | NM_000322    | PRPH2_HUMAN, P23942  |
| <b>RDH12</b>                        | chr14:68168603 (+) | 608830 | 145226  | NM_152443    | RDH12_HUMAN, Q96NR8  |
| <b>ROM1</b>                         | chr11:62380213 (+) | 180721 | 6094    | NM_000327    | ROM1_HUMAN, Q03395   |
| <b>RP9</b>                          | chr7:33134410 (-)  | 607331 | 6100    | NM_203288    | RP9_HUMAN, Q8TA86    |
| <b>SEMA4A</b>                       | chr1:156123322 (+) | 607292 | 64218   | NM_022367    | SEM4A_HUMAN, Q9H3S1  |
| <b>SNRNP200</b>                     | chr2:96940074 (-)  | 601664 | 23020   | NM_014014    | U520_HUMAN, O75643   |
| <b>TOPORS</b>                       | chr9:32540542 (-)  | 609507 | 10210   | NM_005802    | TOPRS_HUMAN, Q9NS56  |

(table continued on next page)

**S1 Table. Summary of the 110 genes related to RP/LCA phenotype inheritance (continued).**

| SYMBOL                     | HG19 LOCATION       | OMIM   | GENBANK | REFSEQ         | UNIProt             |
|----------------------------|---------------------|--------|---------|----------------|---------------------|
| <b>AUTOSOMAL RECESSIVE</b> |                     |        |         |                |                     |
| <b>ABCA4</b>               | chr1:94458394 (-)   | 601691 | 24      | NM_000350      | ABCA4_HUMAN, P78363 |
| <b>ABHD12</b>              | chr20:25275379 (-)  | 613599 | 26090   | NM_001042472   | ABD12_HUMAN, Q8N2KO |
| <b>AHI1</b>                | chr6:135604670 (-)  | 608894 | 54806   | NM_017651      | AHI1_HUMAN, Q8N157  |
| <b>AIPL1</b>               | chr17:6327057 (-)   | 604392 | 23746   | NM_014336      | AIPL1_HUMAN, Q9NZN9 |
| <b>ARL2BP</b>              | chr16:57279038 (+)  | 615407 | 23568   | NM_012106      | AR2BP_HUMAN, Q9Y2Y0 |
| <b>ARL6</b>                | chr3:97483365 (+)   | 608845 | 84100   | NM_006407      | ARL6_HUMAN, Q9H0F7  |
| <b>BBS1</b>                | chr11:66278077 (+)  | 209901 | 582     | NM_024649      | BBS1_HUMAN, Q8NFJ9  |
| <b>BBS2</b>                | chr16:56504301 (-)  | 606151 | 583     | NM_031885      | BBS2_HUMAN, Q9BXC9  |
| <b>C2orf71</b>             | chr2:29284556 (-)   | 613425 | 388939  | NM_001029883   | CB071_HUMAN, A6NGG8 |
| <b>C8orf37</b>             | chr8:96257141 (-)   | 614477 | 157657  | NM_177965      | CH037_HUMAN, Q96NL8 |
| <b>CABP4</b>               | chr11:67219886 (+)  | 608965 | 57010   | NM_145200      | CABP4_HUMAN, P57796 |
| <b>CC2D2A</b>              | chr4:15471489 (+)   | 612013 | 57545   | NM_001080522   | C2D2A_HUMAN, Q9P2K1 |
| <b>CEP290</b>              | chr12:88442790 (-)  | 610142 | 80184   | NM_025114      | CE290_HUMAN, O15078 |
| <b>CERKL</b>               | chr2:182401401 (-)  | 608381 | 375298  | NM_001030311   | CERKL_HUMAN, Q49MI3 |
| <b>CLRN1</b>               | chr3:150644354 (-)  | 606397 | 7401    | NM_052995      | CLRN1_HUMAN, P58418 |
| <b>CNGA1</b>               | chr4:47937994 (-)   | 123825 | 1259    | NM_000087      | CNGA1_HUMAN, P29973 |
| <b>CNGB1</b>               | chr16:57916244 (-)  | 600724 | 1258    | NM_001297      | CNGB1_HUMAN, Q14028 |
| <b>CRB1</b>                | chr1:197237334 (+)  | 604210 | 23418   | NM_201253      | CRUM1_HUMAN, P82279 |
| <b>CYP4V2</b>              | chr4:187112565 (+)  | 608614 | 285440  | NM_207352      | CP4V2_HUMAN, Q6ZWL3 |
| <b>DHDDS</b>               | chr1:26758773 (+)   | 608172 | 79947   | NM_024887      | DHDDS_HUMAN, Q86SQ9 |
| <b>DHX38</b>               | chr16:72127615 (+)  | 605584 | 9785    | NM_014003      | PRP16_HUMAN, Q92620 |
| <b>DTHD1</b>               | chr4:36283237 (+)   | —      | 401124  | NM_001136536   | DTHD1_HUMAN, Q6ZMT9 |
| <b>EMC1</b>                | chr1:19542158 (-)   | —      | 23065   | NM_015047      | EMC1_HUMAN, Q8N76   |
| <b>EYS</b>                 | chr6:64429876 (-)   | 612424 | 346007  | NM_001142800   | EYS_HUMAN, Q5T1H1   |
| <b>FAM161A</b>             | chr2:62051983 (-)   | 613596 | 84140   | NM_001201543   | F161A_HUMAN, Q3B820 |
| <b>FLVCR1</b>              | chr1:213031597 (+)  | 609144 | 28982   | NM_014053      | FLVC1_HUMAN, Q9Y5Y0 |
| <b>GDF6</b>                | chr8:97154558 (-)   | 601147 | 392255  | NM_001001557   | GDF6_HUMAN, Q6KF10  |
| <b>GNPTG</b>               | chr16:1401900 (+)   | 607838 | 84572   | NM_032520      | GNPTG_HUMAN, Q9UJJ9 |
| <b>GPR125</b>              | chr4:22388997 (-)   | 612303 | 166647  | NM_145290      | GP125_HUMAN, Q81WK6 |
| <b>GUCY2D</b>              | chr17:7905988 (+)   | 600179 | 3000    | NM_000180      | GUC2D_HUMAN, Q02846 |
| <b>HGSNAT</b>              | chr8:42995592 (+)   | 610453 | 138050  | NM_152419      | HGNAT_HUMAN, Q68CP4 |
| <b>IDH3B</b>               | chr20:2639041 (-)   | 604526 | 3420    | NM_174855      | IDH3B_HUMAN, O43837 |
| <b>IFT172</b>              | chr2:27667240 (-)   | 607386 | 26160   | NM_015662      | IF172_HUMAN, Q9UG01 |
| <b>IMPG2</b>               | chr3:100941390 (-)  | 607056 | 50939   | NM_016247      | IMPG2_HUMAN, Q9BZV3 |
| <b>INPP5E</b>              | chr9:139323067 (-)  | 613037 | 56623   | NM_019892      | INP5E_HUMAN, Q9NRR6 |
| <b>INVS</b>                | chr9:102861467 (+)  | 243305 | 27130   | NM_183245      | INVS_HUMAN, Q9Y283  |
| <b>IQCB1</b>               | chr3:121488608 (-)  | 609237 | 9657    | NM_001023571   | IQCB1_HUMAN, Q15051 |
| <b>KCNJ13</b>              | chr2:233630512 (-)  | 603208 | 3769    | NM_001172417   | IRK13_HUMAN, O60928 |
| <b>KIAA1549</b>            | chr7:138516127 (-)  | 613344 | 57670   | NM_020910      | K1549_HUMAN, Q9HCM3 |
| <b>KIZ</b>                 | chr20:21106624 (+)  | 615780 | 15865   | NM_001163022.1 | KIZ_HUMAN, Q2M2Z5   |
| <b>LCA5</b>                | chr6:80194708 (-)   | 611408 | 167691  | NM_152505      | LCA5_HUMAN, Q86VQ0  |
| <b>LRAT</b>                | chr4:155665163 (+)  | 604863 | 9227    | NM_004744      | LRAT_HUMAN, O95237  |
| <b>MAK</b>                 | chr6:10762956 (-)   | 154235 | 4117    | NM_005906      | MAK_HUMAN, P20794   |
| <b>MERTK</b>               | chr2:112656191 (+)  | 604705 | 10461   | NM_006343      | MERTK_HUMAN, Q12866 |
| <b>MVK</b>                 | chr12:110011500 (+) | 251170 | 4598    | NM_000431      | KIME_HUMAN, Q03426  |

(table continued on next page)

**S1 Table. Summary of the 110 genes related to RP/LCA phenotype inheritance (continued).**

| SYMBOL                                 | HG19 LOCATION      | OMIM   | GENBANK | REFSEQ       | UNIPROT             |
|----------------------------------------|--------------------|--------|---------|--------------|---------------------|
| <b>AUTOSOMAL RECESSIVE (continued)</b> |                    |        |         |              |                     |
| <i>NEK2</i>                            | chr1:211836114 (-) | 604043 | 4751    | NM_001204183 | NEK2_HUMAN, P51955  |
| <i>NEUROD1</i>                         | chr2:182540833 (-) | 601724 | 4760    | NM_002500    | NDF1_HUMAN, Q13562  |
| <i>NMNAT1</i>                          | chr1:10003486 (+)  | 608700 | 64802   | NM_022787    | NMNA1_HUMAN, Q9HAN9 |
| <i>NPHP1</i>                           | chr2:110880913 (-) | 607100 | 4867    | NM_207181    | NPHP1_HUMAN, O15259 |
| <i>NPHP3</i>                           | chr3:132399453 (-) | 608002 | 27031   | NM_153240    | NPHP3_HUMAN, Q7Z494 |
| <i>NPHP4</i>                           | chr1:5922870 (-)   | 607215 | 261734  | NM_015102    | NPHP4_HUMAN, O75161 |
| <i>PANK2</i>                           | chr20:3869486 (+)  | 606157 | 80025   | NM_153638    | PANK2_HUMAN, Q9BZ23 |
| <i>PDE6A</i>                           | chr5:149237519 (-) | 180071 | 5145    | NM_000440    | PDE6A_HUMAN, P16499 |
| <i>PDE6B</i>                           | chr4:619363 (+)    | 180072 | 5158    | NM_000283    | PDE6B_HUMAN, P35913 |
| <i>PDE6G</i>                           | chr17:79617489 (-) | 180073 | 5148    | NM_002602    | CNRG_HUMAN, P18545  |
| <i>PEX1</i>                            | chr7:92116337 (-)  | 602136 | 5189    | NM_001641    | PEX1_HUMAN, O43933  |
| <i>PEX2</i>                            | chr8:77892494 (-)  | 170993 | 5828    | NM_000318    | PEX2_HUMAN, P28328  |
| <i>PEX7</i>                            | chr6:137143702 (+) | 601757 | 5191    | NM_000288    | PEX7_HUMAN, O00628  |
| <i>PHYH</i>                            | chr10:13319796 (-) | 602026 | 5264    | NM_006214    | PAHX_HUMAN, O14832  |
| <i>PRCD</i>                            | chr17:74523668 (+) | 610598 | 768206  | NM_001077620 | PRCD_HUMAN, Q00LT1  |
| <i>PROM1</i>                           | chr4:15969849 (-)  | 604365 | 8842    | NM_006017    | PROM1_HUMAN, O43490 |
| <i>RBP3</i>                            | chr10:48381487 (-) | 180290 | 5949    | NM_002900    | RET3_HUMAN, P10745  |
| <i>RD3</i>                             | chr1:211649864 (-) | 180040 | 343035  | NM_000796    | RD3_HUMAN, Q7Z3Z2   |
| <i>RDH11</i>                           | chr14:68143517 (-) | 607849 | 51109   | NM_016026    | RDH11_HUMAN, Q8TC12 |
| <i>RGR</i>                             | chr10:86004809 (+) | 600342 | 5995    | NM_001012722 | RGR_HUMAN, P47804   |
| <i>RLBP1</i>                           | chr15:89753098 (-) | 180090 | 6017    | NM_000326    | RLBP1_HUMAN, P12271 |
| <i>RP1L1</i>                           | chr8:10463859 (-)  | 608581 | 94137   | NM_178857    | RP1L1_HUMAN, Q8IWN7 |
| <i>RPGRIP1</i>                         | chr14:21756136 (+) | 605446 | 57096   | NM_015272    | RPGR1_HUMAN, Q96KN7 |
| <i>SAG</i>                             | chr2:234216309 (+) | 181031 | 6295    | NM_000541    | ARRS_HUMAN, P10523  |
| <i>SDCCAG8</i>                         | chr1:243419307 (+) | 613524 | 10806   | NM_006642    | SDCG8_HUMAN, Q86SQ7 |
| <i>SLC7A14</i>                         | chr3:170177342 (-) | 615720 | 57709   | NM_020949    | S7A14_HUMAN, Q8TBB6 |
| <i>SPATA7</i>                          | chr14:88851742 (+) | 609868 | 55812   | NM_018418    | SPAT7_HUMAN, Q9P0W8 |
| <i>TTC8</i>                            | chr14:89290918 (+) | 608132 | 123016  | NM_198309    | TTC8_HUMAN, Q8TAM2  |
| <i>TTPA</i>                            | chr8:63972047 (-)  | 600415 | 7274    | NM_000370    | TTPA_HUMAN, P49638  |
| <i>TUB</i>                             | chr11:8040742 (+)  | 601197 | 7275    | NM_003320    | TUB_HUMAN, P50607   |
| <i>TULP1</i>                           | chr6:35465651 (-)  | 602280 | 7287    | NM_003322    | TULP1_HUMAN, O00294 |
| <i>USH2A</i>                           | chr1:215796236 (-) | 608400 | 7399    | NM_007123    | USH2A_HUMAN, O75445 |
| <i>ZNF408</i>                          | chr11:46722317 (+) | —      | 79797   | NM_024741    | ZN408_HUMAN, Q9H9D4 |
| <i>ZNF513</i>                          | chr2:27600098 (-)  | 613598 | 130557  | NM_144631    | ZN513_HUMAN, Q8N8E2 |
| <b>X-LINKED</b>                        |                    |        |         |              |                     |
| <i>OFD1</i>                            | chrX:13752832 (+)  | 300170 | 8481    | NM_003611    | OFD1_HUMAN, O75665  |
| <i>PRPS1</i>                           | chrX:106871654 (+) | 311850 | 5631    | NM_001204402 | PRPS1_HUMAN, P60891 |
| <i>RP2</i>                             | chrX:46696347 (+)  | 300757 | 6102    | NM_001321    | XRP2_HUMAN, O75695  |
| <i>RPGR</i>                            | chrX:38143702 (-)  | 312610 | 6103    | NM_001034853 | RPGR_HUMAN, Q92834  |
