# Supplementary material for: Distilling a Visual Network of Retinitis Pigmentosa Gene-Protein Interactions to Uncover New Disease Candidates
Source: PubMed Central journal article supplement (PMC4534355; doi:10.1371/journal.pone.0135307), 2015-08-12
Supplement: pone.0135307.s005.pdf [file pone.0135307.s005.pdf]

**S2 Table. Basic graph statistics for the RP genes interaction networks.**

Comparison of the number of nodes (gene/protein) and edges (interactions) provided by the different datasets considered, as well as four intersections: joining interactions filtered from literature abstracts and full text (“Sparsers ALL”); its combination with iHOP curated interactions (“Sparsers + iHOP”); the merge of high-throughput data (“BioGRID + STRING”); and the result of processing

all together (“ALL DBs”). “Hsap Nodes” were filtered from BioGRID human-specific interactions. “Unique Nodes/Edges” correspond to the simplified set of interactions that define the integrated graph from which the RP network was filtered out. “Unique Nodes” also include the RP genes that had no reported interactions on each dataset. Last three columns show results on RPGeNet interaction

network, considering non-syndromic genes (75 RP/LCA genes) and syndromic genes (35 genes) separately and all together (110 genes). This last column data were used to feed the RPGeNet webapp. Graph statistics are described in depth on Newman *et al* [1]. Calculations for all the other columns are based on a preliminary set of 62 selected non-syndromic RP genes.

| SET                         | Sparsers Abstracts | Sparsers Full-Text | Sparsers All | iHOP     | Sparsers + iHOP | BioGRID   | STRING    | BioGRID + STRING | ALL DBs   | RPGeNet v1.0 Genes |           |              |
|-----------------------------|--------------------|--------------------|--------------|----------|-----------------|-----------|-----------|------------------|-----------|--------------------|-----------|--------------|
|                             |                    |                    |              |          |                 |           |           |                  |           | Non-Syndr.         | Syndromic | Total RP/LCA |
| <b>DATABASES</b>            |                    |                    |              |          |                 |           |           |                  |           |                    |           |              |
| Total Nodes                 | 68                 | 380                | 388          | 136      | 488             | 51,877    | 15,993    | 63,068           | 63,139    | 63,139             | 63,139    | 63,139       |
| Hsap Nodes                  |                    |                    |              |          |                 | 15,481    |           | 54,824           | 54,885    | 54,885             | 54,885    | 54,885       |
| Total Edges                 | 64                 | 628                | 692          | 141      | 833             | 761,693   | 926,130   | 1,687,823        | 1,688,656 | 1,688,656          | 1,688,656 | 1,688,656    |
| Unique Nodes                | 120                | 413                | 421          | 157      | 500             | 15,394    | 15,999    | 26,889           | 26,962    | 22,371             | 22,368    | 22,372       |
| Unique Edges                | 60                 | 440                | 459          | 117      | 560             | 159,034   | 640,679   | 794,048          | 794,543   | 752,063            | 752,062   | 752,062      |
| RP <sub>FOUND</sub>         | 10 of 62           | 29 of 62           | 29 of 62     | 40 of 62 | 48 of 62        | 53 of 62  | 14 of 62  | 55 of 62         | 56 of 62  | 70 of 75           | 33 of 35  | 103 of 110   |
| <b>SKELETON GRAPH</b>       |                    |                    |              |          |                 |           |           |                  |           |                    |           |              |
| #Nodes                      | 5                  | 26                 | 26           | 11       | 34              | 289       | 80        | 470              | 532       | 902                | 273       | 1,287        |
| #Edges                      | 4                  | 33                 | 33           | 8        | 43              | 647       | 150       | 1,148            | 1,277     | 3,563              | 781       | 5,883        |
| Density                     | 0.2000             | 0.0508             | 0.0508       | 0.0727   | 0.0383          | 0.0078    | 0.0237    | 0.0052           | 0.0045    | 0.0044             | 0.0105    | 0.0036       |
| #Islands                    | 1                  | 1                  | 1            | 3        | 2               | 1         | 1         | 1                | 1         | 1                  | 1         | 1            |
| Global Cluster Coef.        | 0                  | 0.0845             | 0.0845       | 0        | 0.0957          | 0.0395    | 0.0244    | 0.0151           | 0.0176    | 0.0439             | 0.0434    | 0.0433       |
| Edge Connectivity           | 0                  | 0                  | 0            | 0        | 0               | 0         | 0         | 0                | 0         | 0                  | 0         | 0            |
| Graph Diameter              | 1                  | 6                  | 6            | 2        | 6               | 12        | 11        | 14               | 14        | 11                 | 8         | 10           |
| Graph Reciprocity           | 0                  | 0.1212             | 0.1212       | 0        | 0.1395          | 0.0433    | 0.1867    | 0.1132           | 0.1096    | 0.3441             | 0.3304    | 0.3678       |
| Avg. Graph Degree           | 1.6000             | 2.5385             | 2.5385       | 1.4546   | 2.5294          | 4.4775    | 3.7500    | 4.8851           | 4.8008    | 7.9002             | 5.7216    | 9.1422       |
| Avg. Graph Closeness        | 6.33E-2            | 2.10E-3            | 2.10E-3      | 1.04E-2  | 1.16E-3         | 1.04E-4   | 8.26E-4   | 3.22E-5          | 3.82E-5   | 1.34E-4            | 3.07E-4   | 8.47E-5      |
| Avg. Graph Betweenness      | 0                  | 10.7692            | 10.7692      | 0.2727   | 11.8824         | 998.0554  | 229.7625  | 1,778,062        | 2,043,927 | 2,890.857          | 842.319   | 3,998.789    |
| Avg. Local Cluster Coef.    | 0                  | 0.0931             | 0.0931       | 0        | 0.0918          | 0.0381    | 0.0049    | 0.0118           | 0.0179    | 0.0399             | 0.0449    | 0.0439       |
| Avg. Eigenvector Centrality | 0.7464             | 0.2722             | 0.2722       | 0.3879   | 0.2122          | 0.0642    | 0.1214    | 0.0619           | 0.0601    | 0.0462             | 0.07535   | 0.0362       |
| RP <sub>CONNECTED</sub>     | 5 of 62            | 15 of 62           | 15 of 62     | 11 of 62 | 20 of 62        | 46 of 62  | 14 of 62  | 49 of 62         | 56 of 62  | 70 of 75           | 33 of 35  | 103 of 110   |
| <b>LEVEL 1 GRAPH</b>        |                    |                    |              |          |                 |           |           |                  |           |                    |           |              |
| #Nodes                      | 28                 | 139                | 144          | 124      | 236             | 13,033    | 9,277     | 21,354           | 21,718    | 19,120             | 16,330    | 19,840       |
| #Edges                      | 28                 | 174                | 181          | 108      | 274             | 54,202    | 38,887    | 155,903          | 163,420   | 262,113            | 110,536   | 327,409      |
| Density                     | 0.0370             | 0.0091             | 0.0088       | 0.0071   | 0.0049          | 0.0003    | 0.0005    | 0.0003           | 0.0003    | 0.0007             | 0.0004    | 0.0008       |
| #Islands                    | 5                  | 12                 | 12           | 24       | 22              | 3         | 1         | 3                | 1         | 1                  | 1         | 1            |
| Global Cluster Coef.        | 0.1017             | 0.0644             | 0.0627       | 0.0451   | 0.0512          | 0.0041    | 0.0016    | 0.0063           | 0.0067    | 0.0189             | 0.0046    | 0.0250       |
| Edge Connectivity           | 0                  | 0                  | 0            | 0        | 0               | 0         | 1         | 0                | 0         | 0                  | 0         | 0            |
| Graph Diameter              | 3                  | 7                  | 7            | 4        | 11              | 7         | 7         | 7                | 9         | 7                  | 6         | 7            |
| Graph Reciprocity           | 0.2143             | 0.1839             | 0.1879       | 0.0556   | 0.1606          | 0.2069    | 1.0000    | 0.7086           | 0.7117    | 0.8401             | 0.8148    | 0.8447       |
| Avg. Graph Degree           | 2.0000             | 2.5036             | 2.5139       | 1.7419   | 2.3220          | 8.3177    | 8.3835    | 14.6018          | 15.0493   | 27.4177            | 13.5378   | 33.0049      |
| Avg. Graph Closeness        | 1.44E-3            | 5.96E-5            | 5.57E-5      | 6.66E-5  | 1.95E-5         | 4.43E-8   | 4.41E-5   | 5.08E-8          | 4.94E-8   | 5.84E-8            | 6.72E-8   | 5.40E-8      |
| Avg. Graph Betweenness      | 1.3214             | 30.2158            | 32.1528      | 1.2661   | 40.0000         | 11,252.75 | 13,868.46 | 31,840.04        | 32,823.25 | 28,248.05          | 21,405.85 | 30,063.80    |
| Avg. Local Cluster Coef.    | 0.1708             | 0.2811             | 0.2875       | 0.0432   | 0.2065          | 0.5709    | 0.0690    | 0.2619           | 0.2550    | 0.1768             | 0.2078    | 0.1655       |
| Avg. Eigenvector Centrality | 0.1887             | 0.0721             | 0.0709       | 0.0545   | 0.0470          | 0.0089    | 0.0101    | 0.0067           | 0.0067    | 0.0083             | 0.0077    | 0.0085       |
| RP <sub>CONNECTED</sub>     | 10 of 62           | 29 of 62           | 29 of 62     | 38 of 62 | 47 of 62        | 49 of 62  | 14 of 62  | 51 of 62         | 56 of 62  | 70 of 75           | 33 of 35  | 103 of 110   |
