# Supplementary material for: Distilling a Visual Network of Retinitis Pigmentosa Gene-Protein Interactions to Uncover New Disease Candidates
Source: PubMed Central journal article supplement (PMC4534355; doi:10.1371/journal.pone.0135307), 2015-08-12
Supplement: pone.0135307.s006.pdf [file pone.0135307.s006.pdf]

| GENE         | INDEGREE |       |       |       |       | OUTDEGREE |       |       |       |       | DEGREE |       |       |       |       |
|--------------|----------|-------|-------|-------|-------|-----------|-------|-------|-------|-------|--------|-------|-------|-------|-------|
|              | LVL 0    | LVL 1 | LVL 2 | LVL 3 | LVL 4 | LVL 0     | LVL 1 | LVL 2 | LVL 3 | LVL 4 | LVL 0  | LVL 1 | LVL 2 | LVL 3 | LVL 4 |
| 1 ABCA4      | 4        | 7     | 7     | 7     | 7     | 4         | 6     | 6     | 6     | 6     | 8      | 13    | 13    | 13    | 13    |
| 2 ABHD12     | 0        | 0     | 0     | 0     | 0     | 3         | 3     | 3     | 3     | 3     | 3      | 3     | 3     | 3     | 3     |
| 3 AHI1       | 14       | 26    | 26    | 26    | 26    | 15        | 25    | 25    | 25    | 25    | 29     | 51    | 51    | 51    | 51    |
| 4 AIPL1      | 11       | 28    | 28    | 28    | 28    | 16        | 25    | 25    | 25    | 25    | 27     | 53    | 53    | 53    | 53    |
| 5 ARL2BP     | 4        | 9     | 9     | 9     | 9     | 6         | 12    | 12    | 12    | 12    | 10     | 21    | 21    | 21    | 21    |
| 6 ARL6       | 6        | 16    | 16    | 16    | 16    | 7         | 14    | 14    | 14    | 14    | 13     | 30    | 30    | 30    | 30    |
| 7 BBS1       | 10       | 15    | 15    | 15    | 15    | 4         | 4     | 4     | 4     | 4     | 14     | 19    | 19    | 19    | 19    |
| 8 BBS2       | 11       | 24    | 24    | 24    | 24    | 10        | 17    | 17    | 17    | 17    | 21     | 41    | 41    | 41    | 41    |
| 9 BEST1      | 2        | 3     | 3     | 3     | 3     | 6         | 9     | 9     | 9     | 9     | 8      | 12    | 12    | 12    | 12    |
| 10 C2ORF71   | 0        | 0     | 0     | 0     | 0     | 0         | 0     | 0     | 0     | 0     | 0      | 0     | 0     | 0     | 0     |
| 11 C8ORF37   | 0        | 0     | 0     | 0     | 0     | 1         | 1     | 1     | 1     | 1     | 1      | 1     | 1     | 1     | 1     |
| 12 CA4       | 5        | 6     | 6     | 6     | 6     | 4         | 6     | 6     | 6     | 6     | 9      | 12    | 12    | 12    | 12    |
| 13 CABP4     | 4        | 4     | 4     | 4     | 4     | 4         | 4     | 4     | 4     | 4     | 8      | 8     | 8     | 8     | 8     |
| 14 CC2D2A    | 5        | 13    | 13    | 13    | 13    | 4         | 13    | 13    | 13    | 13    | 9      | 26    | 26    | 26    | 26    |
| 15 CEP290    | 30       | 84    | 84    | 84    | 84    | 36        | 83    | 83    | 83    | 83    | 66     | 167   | 167   | 167   | 167   |
| 16 CERKL     | 10       | 19    | 19    | 19    | 19    | 15        | 18    | 18    | 18    | 18    | 25     | 37    | 37    | 37    | 37    |
| 17 CLRN1     | 1        | 1     | 1     | 1     | 1     | 0         | 1     | 1     | 1     | 1     | 1      | 2     | 2     | 2     | 2     |
| 18 CNGA1     | 6        | 7     | 7     | 7     | 7     | 6         | 8     | 8     | 8     | 8     | 12     | 15    | 15    | 15    | 15    |
| 19 CNGB1     | 17       | 23    | 23    | 23    | 23    | 18        | 25    | 25    | 25    | 25    | 35     | 48    | 48    | 48    | 48    |
| 20 CRB1      | 12       | 32    | 32    | 32    | 32    | 27        | 38    | 38    | 38    | 38    | 39     | 70    | 70    | 70    | 70    |
| 21 CRX       | 35       | 95    | 95    | 95    | 95    | 42        | 95    | 95    | 95    | 95    | 77     | 190   | 190   | 190   | 190   |
| 22 CYP4V2    | 3        | 5     | 5     | 5     | 5     | 4         | 5     | 5     | 5     | 5     | 7      | 10    | 10    | 10    | 10    |
| 23 DHDDS     | 2        | 7     | 7     | 7     | 7     | 5         | 8     | 8     | 8     | 8     | 7      | 15    | 15    | 15    | 15    |
| 24 DHX38     | 31       | 148   | 148   | 148   | 148   | 41        | 154   | 154   | 154   | 154   | 72     | 302   | 302   | 302   | 302   |
| 25 DTHD1     | 0        | 0     | 0     | 0     | 0     | 0         | 0     | 0     | 0     | 0     | 0      | 0     | 0     | 0     | 0     |
| 26 EMC1      | 0        | 0     | 0     | 0     | 0     | 7         | 8     | 8     | 8     | 8     | 7      | 8     | 8     | 8     | 8     |
| 27 EYS       | 2        | 3     | 3     | 3     | 3     | 3         | 3     | 3     | 3     | 3     | 5      | 6     | 6     | 6     | 6     |
| 28 FAM161A   | 1        | 1     | 1     | 1     | 1     | 1         | 1     | 1     | 1     | 1     | 2      | 2     | 2     | 2     | 2     |
| 29 FLVCR1    | 4        | 5     | 5     | 5     | 5     | 1         | 4     | 4     | 4     | 4     | 5      | 9     | 9     | 9     | 9     |
| 30 FSCN2     | 1        | 1     | 1     | 1     | 1     | 2         | 3     | 3     | 3     | 3     | 3      | 4     | 4     | 4     | 4     |
| 31 GDF6      | 6        | 7     | 7     | 7     | 7     | 6         | 7     | 7     | 7     | 7     | 12     | 14    | 14    | 14    | 14    |
| 32 GNPTG     | 13       | 23    | 23    | 23    | 23    | 14        | 25    | 25    | 25    | 25    | 27     | 48    | 48    | 48    | 48    |
| 33 GPR125    | 2        | 2     | 2     | 2     | 2     | 2         | 3     | 3     | 3     | 3     | 4      | 5     | 5     | 5     | 5     |
| 34 GUCA1B    | 6        | 8     | 8     | 8     | 8     | 8         | 10    | 10    | 10    | 10    | 14     | 18    | 18    | 18    | 18    |
| 35 GUCY2D    | 10       | 17    | 17    | 17    | 17    | 16        | 18    | 18    | 18    | 18    | 26     | 35    | 35    | 35    | 35    |
| 36 HGSNAT    | 0        | 0     | 0     | 0     | 0     | 0         | 0     | 0     | 0     | 0     | 0      | 0     | 0     | 0     | 0     |
| 37 HK1       | 18       | 41    | 41    | 41    | 41    | 26        | 51    | 51    | 51    | 51    | 44     | 92    | 92    | 92    | 92    |
| 38 IDH3B     | 13       | 33    | 33    | 33    | 33    | 17        | 40    | 40    | 40    | 40    | 30     | 73    | 73    | 73    | 73    |
| 39 IFT172    | 3        | 10    | 10    | 10    | 10    | 6         | 12    | 12    | 12    | 12    | 9      | 22    | 22    | 22    | 22    |
| 40 IMPDH1    | 5        | 7     | 7     | 7     | 7     | 9         | 14    | 14    | 14    | 14    | 14     | 21    | 21    | 21    | 21    |
| 41 IMPG2     | 0        | 0     | 0     | 0     | 0     | 0         | 0     | 0     | 0     | 0     | 0      | 0     | 0     | 0     | 0     |
| 42 INPP5E    | 9        | 11    | 11    | 11    | 11    | 11        | 12    | 12    | 12    | 12    | 20     | 23    | 23    | 23    | 23    |
| 43 INVS      | 16       | 22    | 22    | 22    | 22    | 12        | 16    | 16    | 16    | 16    | 28     | 38    | 38    | 38    | 38    |
| 44 IQCB1     | 34       | 187   | 187   | 187   | 187   | 9         | 10    | 10    | 10    | 10    | 43     | 197   | 197   | 197   | 197   |
| 45 KCNJ13    | 0        | 0     | 0     | 0     | 0     | 0         | 0     | 0     | 0     | 0     | 0      | 0     | 0     | 0     | 0     |
| 46 KIAA1549  | 6        | 8     | 8     | 8     | 8     | 5         | 7     | 7     | 7     | 7     | 11     | 15    | 15    | 15    | 15    |
| 47 KIZ       | 1        | 1     | 1     | 1     | 1     | 2         | 2     | 2     | 2     | 2     | 3      | 3     | 3     | 3     | 3     |
| 48 KLHL7     | 4        | 6     | 6     | 6     | 6     | 2         | 4     | 4     | 4     | 4     | 6      | 10    | 10    | 10    | 10    |
| 49 LCA5      | 4        | 4     | 4     | 4     | 4     | 4         | 4     | 4     | 4     | 4     | 8      | 8     | 8     | 8     | 8     |
| 50 LRAT      | 1        | 2     | 2     | 2     | 2     | 2         | 4     | 4     | 4     | 4     | 3      | 6     | 6     | 6     | 6     |
| 51 MAK       | 24       | 80    | 80    | 80    | 80    | 39        | 72    | 72    | 72    | 72    | 63     | 152   | 152   | 152   | 152   |
| 52 MERTK     | 23       | 55    | 55    | 55    | 55    | 28        | 56    | 56    | 56    | 56    | 51     | 111   | 111   | 111   | 111   |
| 53 MVK       | 9        | 16    | 16    | 16    | 16    | 13        | 19    | 19    | 19    | 19    | 22     | 35    | 35    | 35    | 35    |
| 54 NEK2      | 13       | 22    | 22    | 22    | 22    | 16        | 23    | 23    | 23    | 23    | 29     | 45    | 45    | 45    | 45    |
| 55 NEUROD1   | 24       | 60    | 60    | 60    | 60    | 25        | 66    | 66    | 66    | 66    | 49     | 126   | 126   | 126   | 126   |
| 56 NMNAT1    | 7        | 18    | 18    | 18    | 18    | 12        | 19    | 19    | 19    | 19    | 19     | 37    | 37    | 37    | 37    |
| 57 NPHP1     | 21       | 55    | 55    | 55    | 55    | 28        | 53    | 53    | 53    | 53    | 49     | 108   | 108   | 108   | 108   |
| 58 NPHP3     | 11       | 14    | 14    | 14    | 14    | 14        | 15    | 15    | 15    | 15    | 25     | 29    | 29    | 29    | 29    |
| 59 NPHP4     | 11       | 14    | 14    | 14    | 14    | 11        | 14    | 14    | 14    | 14    | 22     | 28    | 28    | 28    | 28    |
| 60 NR2E3     | 11       | 18    | 18    | 18    | 18    | 13        | 13    | 13    | 13    | 13    | 24     | 31    | 31    | 31    | 31    |
| 61 NRL       | 10       | 16    | 16    | 16    | 16    | 9         | 13    | 13    | 13    | 13    | 19     | 29    | 29    | 29    | 29    |
| 62 OFD1      | 30       | 66    | 66    | 66    | 66    | 33        | 70    | 70    | 70    | 70    | 63     | 136   | 136   | 136   | 136   |
| 63 OR2W3     | 14       | 272   | 272   | 272   | 272   | 22        | 272   | 272   | 272   | 272   | 36     | 544   | 544   | 544   | 544   |
| 64 OTX2      | 21       | 57    | 57    | 57    | 57    | 27        | 49    | 49    | 49    | 49    | 48     | 106   | 106   | 106   | 106   |
| 65 PANK2     | 9        | 21    | 21    | 21    | 21    | 14        | 17    | 17    | 17    | 17    | 23     | 38    | 38    | 38    | 38    |
| 66 PDE6A     | 4        | 6     | 6     | 6     | 6     | 5         | 8     | 8     | 8     | 8     | 9      | 14    | 14    | 14    | 14    |
| 67 PDE6B     | 5        | 7     | 7     | 7     | 7     | 9         | 14    | 14    | 14    | 14    | 14     | 21    | 21    | 21    | 21    |
| 68 PDE6G     | 4        | 4     | 4     | 4     | 4     | 2         | 2     | 2     | 2     | 2     | 6      | 6     | 6     | 6     | 6     |
| 69 PEX1      | 5        | 12    | 12    | 12    | 12    | 7         | 16    | 16    | 16    | 16    | 12     | 28    | 28    | 28    | 28    |
| 70 PEX2      | 3        | 5     | 5     | 5     | 5     | 3         | 3     | 3     | 3     | 3     | 6      | 8     | 8     | 8     | 8     |
| 71 PEX7      | 11       | 15    | 15    | 15    | 15    | 9         | 12    | 12    | 12    | 12    | 20     | 27    | 27    | 27    | 27    |
| 72 PHYH      | 5        | 15    | 15    | 15    | 15    | 10        | 16    | 16    | 16    | 16    | 15     | 31    | 31    | 31    | 31    |
| 73 PRCD      | 0        | 0     | 0     | 0     | 0     | 0         | 0     | 0     | 0     | 0     | 0      | 0     | 0     | 0     | 0     |
| 74 PROM1     | 8        | 21    | 21    | 21    | 21    | 14        | 22    | 22    | 22    | 22    | 22     | 43    | 43    | 43    | 43    |
| 75 PRPF3     | 25       | 111   | 111   | 111   | 111   | 29        | 122   | 122   | 122   | 122   | 54     | 233   | 233   | 233   | 233   |
| 76 PRPF31    | 39       | 183   | 183   | 183   | 183   | 46        | 191   | 191   | 191   | 191   | 85     | 374   | 374   | 374   | 374   |
| 77 PRPF4     | 37       | 196   | 196   | 196   | 196   | 38        | 195   | 195   | 195   | 195   | 75     | 391   | 391   | 391   | 391   |
| 78 PRPF6     | 38       | 241   | 241   | 241   | 241   | 47        | 254   | 254   | 254   | 254   | 85     | 495   | 495   | 495   | 495   |
| 79 PRPF8     | 12       | 42    | 42    | 42    | 42    | 32        | 85    | 85    | 85    | 85    | 44     | 127   | 127   | 127   | 127   |
| 80 PRPH2     | 1        | 1     | 1     | 1     | 1     | 1         | 2     | 2     | 2     | 2     | 2      | 3     | 3     | 3     | 3     |
| 81 PRPS1     | 15       | 35    | 35    | 35    | 35    | 24        | 41    | 41    | 41    | 41    | 39     | 76    | 76    | 76    | 76    |
| 82 RBP3      | 9        | 12    | 12    | 12    | 12    | 14        | 14    | 14    | 14    | 14    | 23     | 26    | 26    | 26    | 26    |
| 83 RD3       | 1        | 1     | 1     | 1     | 1     | 0         | 0     | 0     | 0     | 0     | 1      | 1     | 1     | 1     | 1     |
| 84 RDH11     | 4        | 7     | 7     | 7     | 7     | 8         | 11    | 11    | 11    | 11    | 12     | 18    | 18    | 18    | 18    |
| 85 RDH12     | 2        | 2     | 2     | 2     | 2     | 5         | 5     | 5     | 5     | 5     | 7      | 7     | 7     | 7     | 7     |
| 86 RGR       | 1        | 1     | 1     | 1     | 1     | 1         | 1     | 1     | 1     | 1     | 2      | 2     | 2     | 2     | 2     |
| 87 RHO       | 23       | 53    | 53    | 53    | 53    | 37        | 74    | 74    | 74    | 74    | 60     | 127   | 127   | 127   | 127   |
| 88 RLBP1     | 4        | 4     | 4     | 4     | 4     | 4         | 4     | 4     | 4     | 4     | 8      | 8     | 8     | 8     | 8     |
| 89 ROM1      | 0        | 1     | 1     | 1     | 1     | 3         | 4     | 4     | 4     | 4     | 3      | 5     | 5     | 5     | 5     |
| 90 RP1       | 11       | 19    | 19    | 19    | 19    | 16        | 19    | 19    | 19    | 19    | 27     | 38    | 38    | 38    | 38    |
| 91 RP1L1     | 1        | 1     | 1     | 1     | 1     | 0         | 0     | 0     | 0     | 0     | 1      | 1     | 1     | 1     | 1     |
| 92 RP2       | 4        | 4     | 4     | 4     | 4     | 5         | 5     | 5     | 5     | 5     | 9      | 9     | 9     | 9     | 9     |
| 93 RP9       | 3        | 4     | 4     | 4     | 4     | 4         | 8     | 8     | 8     | 8     | 7      | 12    | 12    | 12    | 12    |
| 94 RPE65     | 2        | 3     | 3     | 3     | 3     | 3         | 8     | 8     | 8     | 8     | 5      | 11    | 11    | 11    | 11    |
| 95 RPGR      | 17       | 42    | 42    | 42    | 42    | 21        | 40    | 40    | 40    | 40    | 38     | 82    | 82    | 82    | 82    |
| 96 RPGRI1    | 7        | 9     | 9     | 9     | 9     | 6         | 7     | 7     | 7     | 7     | 13     | 16    | 16    | 16    | 16    |
| 97 SAG       | 15       | 28    | 28    | 28    | 28    | 14        | 30    | 30    | 30    | 30    | 29     | 58    | 58    | 58    | 58    |
| 98 SDCCAG8   | 28       | 57    | 57    | 57    | 57    | 36        | 59    | 59    | 59    | 59    | 64     | 116   | 116   | 116   | 116   |
| 99 SEMA4A    | 1        | 1     | 1     | 1     | 1     | 2         | 2     | 2     | 2     | 2     | 3      | 3     | 3     | 3     | 3     |
| 100 SLC7A14  | 0        | 0     | 0     | 0     | 0     | 0         | 0     | 0     | 0     | 0     | 0      | 0     | 0     | 0     | 0     |
| 101 SNRNP200 | 35       | 233   | 233   | 233   | 233   | 51        | 281   | 281   | 281   | 281   | 86     | 514   | 514   | 514   | 514   |
| 102 SPATA7   | 1        | 1     | 1     | 1     | 1     | 0         | 0     | 0     | 0     | 0     | 1      | 1     | 1     | 1     | 1     |
| 103 TOPORS   | 21       | 33    | 33    | 33    | 33    | 16        | 26    | 26    | 26    | 26    | 37     | 59    | 59    | 59    | 59    |
| 104 TTC8     | 6        | 7     | 7     | 7     | 7     | 5         | 8     | 8     | 8     | 8     | 11     | 15    | 15    | 15    | 15    |
| 105 TTPA     | 1        | 1     | 1     | 1     | 1     | 1         | 1     | 1     | 1     | 1     | 2      | 2     | 2     | 2     | 2     |
| 106 TUB      | 6        | 6     | 6     | 6     | 6     | 9         | 11    | 11    | 11    | 11    | 15     |       |       |       |       |
