# Supplementary material for: Distilling a Visual Network of Retinitis Pigmentosa Gene-Protein Interactions to Uncover New Disease Candidates
Source: PubMed Central journal article supplement (PMC4534355; doi:10.1371/journal.pone.0135307), 2015-08-12
Supplement: pone.0135307.s007.pdf [file pone.0135307.s007.pdf]

| SET | Sparser Abstracts      | Sparser FullText | iHOP | BIOGRID | STRING  | Sparser ALL | Sparser +iHOP | BIOGRID +STRING | ALL DBs   | Non-Syndromic RP/LCA GENES | Syndromic RP/LCA GENES | RPGeNet v1.0 | SET       | GENE                   |
|-----|------------------------|------------------|------|---------|---------|-------------|---------------|-----------------|-----------|----------------------------|------------------------|--------------|-----------|------------------------|
| 1   | ABCA4                  | 0                | 0    | 0       | 1       | 12          | 0             | 0               | 12        | 12                         | 8                      | 8            | ABCA4     |                        |
| 2   | ABHD12                 |                  |      |         |         |             |               |                 |           |                            | 3                      | 3            | ABHD12    |                        |
| 3   | AHI1                   |                  |      |         |         |             |               |                 |           |                            | 23                     | 29           | AHI1      |                        |
| 4   | AIP1                   |                  |      |         |         |             |               |                 |           | 27                         |                        | 27           | AIP1      |                        |
| 5   | ARL2BP                 | 0                | 1    | 1       | 10      | 8           | 1             | 1               | 8         | 1                          | 9                      | 10           | ARL2BP    |                        |
| 6   | ARL6                   |                  |      |         |         |             |               |                 |           |                            | 10                     | 13           | ARL6      |                        |
| 7   | BBS1                   |                  |      |         |         |             |               |                 |           |                            | 10                     | 14           | BBS1      |                        |
| 8   | BBS2                   |                  |      |         |         |             |               |                 |           |                            | 13                     | 21           | BBS2      |                        |
| 9   | BEST1                  | 0                | 0    | 7       | 2       | 0           | 0             | 7               | 2         | 7                          | 7                      | 8            | BEST1     |                        |
| 10  | C2ORF71                | 0                | 0    | 0       | 0       | 0           | 0             | 0               | 0         | 0                          | 0                      | 0            | C2ORF71   |                        |
| 11  | C8ORF37                | 0                | 0    | 0       | 0       | 0           | 0             | 0               | 0         | 0                          | 1                      | 1            | C8ORF37   |                        |
| 12  | CA4                    | 0                | 0    | 2       | 5       | 8           | 0             | 2               | 8         | 2                          | 9                      | 9            | CA4       |                        |
| 13  | CABP4                  |                  |      |         |         |             |               |                 |           |                            | 8                      | 8            | CABP4     |                        |
| 14  | CC2D2A                 |                  |      |         |         |             |               |                 |           |                            | 8                      | 9            | CC2D2A    |                        |
| 15  | CEP290                 |                  |      |         |         |             |               |                 |           |                            | 32                     | 66           | CEP290    |                        |
| 16  | CERKL                  | 0                | 2    | 0       | 0       | 36          | 2             | 2               | 36        | 2                          | 26                     | 0            | 25        | CERKL                  |
| 17  | CLRN1                  | 0                | 1    | 1       | 0       | 0           | 1             | 1               | 0         | 1                          | 1                      | 1            | 1         | CLRN1                  |
| 18  | CNGA1                  | 0                | 1    | 1       | 1       | 0           | 1             | 1               | 1         | 1                          | 10                     | 12           | CNGA1     |                        |
| 19  | CNGB1                  | 0                | 2    | 3       | 3       | 0           | 2             | 3               | 3         | 3                          | 33                     | 35           | CNGB1     |                        |
| 20  | CRB1                   | 0                | 0    | 3       | 3       | 74          | 0             | 3               | 74        | 3                          | 31                     | 39           | CRB1      |                        |
| 21  | CRX                    | 5                | 22   | 16      | 22      | 0           | 22            | 16              | 22        | 16                         | 62                     | 77           | CRX       |                        |
| 22  | CYP4V2                 |                  |      |         |         |             |               |                 |           |                            | 7                      | 7            | CYP4V2    |                        |
| 23  | DHDDS                  | 0                | 0    | 0       | 9       | 10          | 0             | 0               | 10        | 10                         | 8                      | 7            | DHDDS     |                        |
| 24  | DHX38                  |                  |      |         |         |             |               |                 |           |                            | 64                     | 72           | DHX38     |                        |
| 25  | DTHD1                  |                  |      |         |         |             |               |                 |           |                            | 0                      | 0            | DTHD1     |                        |
| 26  | EMC1                   | 0                | 0    | 0       | 72      | 0           | 0             | 0               | 72        | 72                         | 7                      | 7            | EMC1      |                        |
| 27  | EYS                    | 0                | 0    | 0       | 0       | 0           | 0             | 0               | 0         | 0                          | 5                      | 5            | EYS       |                        |
| 28  | FAM161A                | 0                | 0    | 0       | 2       | 0           | 0             | 0               | 2         | 2                          | 2                      | 2            | FAM161A   |                        |
| 29  | FLVCR1                 |                  |      |         |         |             |               |                 |           |                            | 4                      | 5            | FLVCR1    |                        |
| 30  | FSCN2                  | 1                | 6    | 1       | 0       | 4           | 6             | 1               | 4         | 1                          | 3                      | 3            | FSCN2     |                        |
| 31  | GDF6                   |                  |      |         |         |             |               |                 |           |                            | 11                     | 12           | GDF6      |                        |
| 32  | GNPTG                  |                  |      |         |         |             |               |                 |           |                            | 11                     | 27           | GNPTG     |                        |
| 33  | GPR125                 | 0                | 0    | 0       | 1       | 4           | 0             | 0               | 4         | 4                          | 4                      | 4            | GPR125    |                        |
| 34  | GUCA1B                 | 0                | 1    | 3       | 0       | 0           | 1             | 3               | 0         | 3                          | 15                     | 14           | GUCA1B    |                        |
| 35  | GUCY2D                 |                  |      |         |         |             |               |                 |           |                            | 22                     | 26           | GUCY2D    |                        |
| 36  | HGSNAT                 |                  |      |         |         |             |               |                 |           |                            | 0                      | 0            | HGSNAT    |                        |
| 37  | HK1                    |                  |      |         |         |             |               |                 |           |                            | 44                     | 44           | HK1       |                        |
| 38  | IDH3B                  | 0                | 0    | 0       | 11      | 66          | 0             | 0               | 66        | 66                         | 33                     | 30           | IDH3B     |                        |
| 39  | IFT172                 |                  |      |         |         |             |               |                 |           |                            | 9                      | 9            | IFT172    |                        |
| 40  | IMPDH1                 | 0                | 1    | 0       | 13      | 12          | 1             | 1               | 12        | 1                          | 11                     | 14           | IMPDH1    |                        |
| 41  | IMPG2                  | 0                | 0    | 0       | 0       | 0           | 0             | 0               | 0         | 0                          | 0                      | 0            | IMPG2     |                        |
| 42  | INPP5E                 |                  |      |         |         |             |               |                 |           |                            | 11                     | 20           | INPP5E    |                        |
| 43  | INVS                   |                  |      |         |         |             |               |                 |           |                            | 22                     | 28           | INVS      |                        |
| 44  | IQCB1                  |                  |      |         |         |             |               |                 |           |                            | 22                     | 43           | IQCB1     |                        |
| 45  | KCNJ13                 |                  |      |         |         |             |               |                 |           |                            | 0                      | 0            | KCNJ13    |                        |
| 46  | KIAA1549               | 0                | 0    | 1       | 9       | 6           | 0             | 1               | 6         | 1                          | 11                     | 11           | KIAA1549  |                        |
| 47  | KIZ                    |                  |      |         |         |             |               |                 |           |                            | 3                      | 3            | KIZ       |                        |
| 48  | KLHL7                  | 1                | 3    | 0       | 14      | 0           | 3             | 3               | 14        | 3                          | 6                      | 6            | KLHL7     |                        |
| 49  | LCA5                   |                  |      |         |         |             |               |                 |           |                            | 8                      | 8            | LCA5      |                        |
| 50  | LRAT                   | 0                | 0    | 2       | 2       | 0           | 0             | 2               | 2         | 2                          | 3                      | 3            | LRAT      |                        |
| 51  | MAK                    | 0                | 0    | 2       | 14      | 186         | 0             | 2               | 186       | 2                          | 52                     | 63           | MAK       |                        |
| 52  | MERTK                  | 1                | 8    | 0       | 16      | 100         | 8             | 8               | 100       | 8                          | 45                     | 51           | MERTK     |                        |
| 53  | MVK                    | 0                | 0    | 1       | 11      | 0           | 0             | 1               | 11        | 1                          | 19                     | 22           | MVK       |                        |
| 54  | NEK2                   | 0                | 2    | 0       | 56      | 0           | 2             | 2               | 56        | 2                          | 22                     | 29           | NEK2      |                        |
| 55  | NEUROD1                |                  |      |         |         |             |               |                 |           |                            | 25                     | 49           | NEUROD1   |                        |
| 56  | NMNAT1                 |                  |      |         |         |             |               |                 |           |                            | 18                     | 19           | NMNAT1    |                        |
| 57  | NPHP1                  |                  |      |         |         |             |               |                 |           |                            | 26                     | 49           | NPHP1     |                        |
| 58  | NPHP3                  |                  |      |         |         |             |               |                 |           |                            | 18                     | 25           | NPHP3     |                        |
| 59  | NPHP4                  |                  |      |         |         |             |               |                 |           |                            | 12                     | 22           | NPHP4     |                        |
| 60  | NR2E3                  | 0                | 4    | 4       | 30      | 0           | 4             | 4               | 30        | 4                          | 21                     | 24           | NR2E3     |                        |
| 61  | NRL                    | 6                | 33   | 7       | 6       | 0           | 33            | 7               | 6         | 7                          | 16                     | 19           | NRL       |                        |
| 62  | OFD1                   | 0                | 7    | 1       | 26      | 0           | 7             | 1               | 26        | 1                          | 24                     | 63           | OFD1      |                        |
| 63  | OR2W3                  |                  |      |         |         |             |               |                 |           |                            | 33                     | 36           | OR2W3     |                        |
| 64  | OTX2                   |                  |      |         |         |             |               |                 |           |                            | 28                     | 48           | OTX2      |                        |
| 65  | PANK2                  |                  |      |         |         |             |               |                 |           |                            | 14                     | 23           | PANK2     |                        |
| 66  | PDE6A                  | 0                | 0    | 1       | 1       | 12          | 0             | 1               | 12        | 1                          | 9                      | 9            | PDE6A     |                        |
| 67  | PDE6B                  | 0                | 3    | 4       | 2       | 0           | 3             | 4               | 2         | 4                          | 15                     | 14           | PDE6B     |                        |
| 68  | PDE6G                  | 0                | 0    | 0       | 8       | 0           | 0             | 0               | 8         | 8                          | 6                      | 6            | PDE6G     |                        |
| 69  | PEX1                   |                  |      |         |         |             |               |                 |           |                            | 9                      | 12           | PEX1      |                        |
| 70  | PEX2                   |                  |      |         |         |             |               |                 |           |                            | 5                      | 6            | PEX2      |                        |
| 71  | PEX7                   |                  |      |         |         |             |               |                 |           |                            | 13                     | 20           | PEX7      |                        |
| 72  | PHYH                   |                  |      |         |         |             |               |                 |           |                            | 10                     | 15           | PHYH      |                        |
| 73  | PRCD                   | 0                | 0    | 0       | 0       | 0           | 0             | 0               | 0         | 0                          | 0                      | 0            | PRCD      |                        |
| 74  | PROM1                  | 0                | 0    | 1       | 4       | 0           | 0             | 1               | 4         | 1                          | 21                     | 22           | PROM1     |                        |
| 75  | PRPF3                  | 4                | 4    | 6       | 69      | 0           | 4             | 6               | 69        | 6                          | 47                     | 54           | PRPF3     |                        |
| 76  | PRPF31                 | 0                | 29   | 3       | 135     | 0           | 29            | 3               | 135       | 3                          | 66                     | 85           | PRPF31    |                        |
| 77  | PRPF4                  |                  |      |         |         |             |               |                 |           |                            | 68                     | 75           | PRPF4     |                        |
| 78  | PRPF6                  | 0                | 0    | 6       | 119     | 0           | 0             | 6               | 119       | 6                          | 68                     | 85           | PRPF6     |                        |
| 79  | PRPF8                  | 1                | 9    | 0       | 180     | 0           | 9             | 9               | 180       | 9                          | 43                     | 44           | PRPF8     |                        |
| 80  | PRPH2                  | 0                | 0    | 3       | 0       | 0           | 0             | 3               | 0         | 3                          | 2                      | 2            | PRPH2     |                        |
| 81  | PRPS1                  |                  |      |         |         |             |               |                 |           |                            | 17                     | 39           | PRPS1     |                        |
| 82  | RBP3                   | 0                | 0    | 2       | 1       | 0           | 0             | 2               | 1         | 2                          | 20                     | 23           | RBP3      |                        |
| 83  | RD3                    |                  |      |         |         |             |               |                 |           |                            | 1                      | 1            | RD3       |                        |
| 84  | RDH11                  |                  |      |         |         |             |               |                 |           |                            | 7                      | 12           | RDH11     |                        |
| 85  | RDH12                  | 0                | 0    | 1       | 10      | 0           | 0             | 1               | 10        | 1                          | 6                      | 7            | RDH12     |                        |
| 86  | RGR                    | 0                | 0    | 1       | 2       | 0           | 0             | 1               | 2         | 1                          | 2                      | 2            | RGR       |                        |
| 87  | RHO                    | 6                | 86   | 10      | 22      | 0           | 86            | 10              | 22        | 10                         | 52                     | 60           | RHO       |                        |
| 88  | RLBP1                  | 0                | 0    | 2       | 2       | 0           | 0             | 2               | 2         | 2                          | 8                      | 8            | RLBP1     |                        |
| 89  | ROM1                   | 0                | 2    | 1       | 51      | 0           | 2             | 1               | 51        | 1                          | 3                      | 3            | ROM1      |                        |
| 90  | RP1                    | 0                | 0    | 0       | 6       | 0           | 0             | 0               | 6         | 6                          | 23                     | 27           | RP1       |                        |
| 91  | RP1L1                  |                  |      |         |         |             |               |                 |           |                            | 1                      | 1            | RP1L1     |                        |
| 92  | RP2                    | 0                | 0    | 2       | 8       | 0           | 0             | 2               | 8         | 2                          | 9                      | 9            | RP2       |                        |
| 93  | RP9                    | 0                | 3    | 6       | 9       | 0           | 3             | 6               | 9         | 6                          | 8                      | 7            | RP9       |                        |
| 94  | RPE65                  | 0                | 1    | 3       | 5       | 0           | 1             | 3               | 5         | 3                          | 6                      | 5            | RPE65     |                        |
| 95  | RPGR                   | 10               | 42   | 4       | 25      | 0           | 42            | 4               | 25        | 4                          | 31                     | 38           | RPGR      |                        |
| 96  | RPGRIP1                |                  |      |         |         |             |               |                 |           |                            | 12                     | 13           | RPGRIP1   |                        |
| 97  | SAG                    | 0                | 5    | 2       | 4       | 0           | 5             | 2               | 4         | 2                          | 24                     | 29           | SAG       |                        |
| 98  | SDCCAG8                |                  |      |         |         |             |               |                 |           |                            | 30                     | 64           | SDCCAG8   |                        |
| 99  | SEMA4A                 | 0                | 0    | 1       | 1       | 0           | 0             | 1               | 1         | 1                          | 3                      | 3            | SEMA4A    |                        |
| 100 | SLC7A14                |                  |      |         |         |             |               |                 |           |                            | 0                      | 0            | SLC7A14   |                        |
| 101 | SNRNP200               | 1                | 8    | 1       | 170     | 0           | 8             | 1               | 170       | 1                          | 71                     | 86           | SNRNP200  |                        |
| 102 | SPATA7                 | 0                | 0    | 0       | 1       | 0           | 0             | 0               | 1         | 1                          | 1                      | 1            | SPATA7    |                        |
| 103 | TOPORS                 | 0                | 0    | 8       | 81      | 0           | 0             | 8               | 81        | 8                          | 32                     | 37           | TOPORS    |                        |
| 104 | TTC8                   | 0                | 0    | 1       | 3       | 0           | 0             | 1               | 3         | 1                          | 9                      | 11           | TTC8      |                        |
| 105 | TTPA                   |                  |      |         |         |             |               |                 |           |                            | 2                      | 2            | TTPA      |                        |
| 106 | TUB                    |                  |      |         |         |             |               |                 |           |                            | 11                     | 15           | TUB       |                        |
| 107 | TULP1                  | 0                | 1    | 0       | 0       | 0           | 1             | 1               | 0         | 1                          | 3                      | 3            | TULP1     |                        |
| 108 | USH2A                  | 0                | 6    | 4       | 1       | 0           | 6             | 4               | 1         | 4                          | 33                     | 51           | USH2A     |                        |
| 109 | ZNF408                 |                  |      |         |         |             |               |                 |           |                            | 38                     | 42           | ZNF408    |                        |
| 110 | ZNF513                 | 0                | 3    | 0       | 5       | 0           | 3             | 3               | 5         | 3                          | 15                     | 15           | ZNF513    |                        |
|     | RP <sub>F</sub>        | 10               | 29   | 40      | 51      | 14          | 29            | 48              | 53        | 57                         | 70                     | 33           | 103       | RP <sub>F</sub>        |
|     | RP <sub>M</sub>        | 52               | 33   | 22      | 11      | 48          | 33            | 14              | 9         | 5                          | 5                      | 2            | 7         | RP <sub>M</sub>        |
|     | RP <sub>C_skel</sub>   | 5                | 15   | 11      | 46      | 14          | 15            | 20              | 49        | 56                         | 70                     | 33           | 103       | RP <sub>C_skel</sub>   |
|     | RP <sub>C_level1</sub> | 10               | 29   | 38      | 49      | 14          | 29            | 47              | 51        | 56                         | 70                     | 33           | 103       | RP <sub>C_level1</sub> |
|     | TOTAL RP INTERACTIONS  | 36               | 296  | 129     | 1,264   | 538         | 296           | 158             | 1,709     | 339                        | 1,427                  | 483          | 2,430     | TOTAL RP INTERACTIONS  |
|     | TOTAL DB INTERACTIONS  | 64               | 628  | 141     | 761,694 | 926,130     | 692           | 692             | 1,687,824 | 1,688,657                  | 1,688,657              | 1,688,657    | 1,688,657 | TOTAL DB INTERACTIONS  |
